# Supplementary material
Source: HighWire-hosted journal article supplement (https://genome.cshlp.org/content/suppl/2009/05/01/19.5.778)
Supplement: Supp_Fig_1.pdf [file Supp_Fig_1.pdf]

**Supplemental Figure 1**

Validation of ChIP enrichments before (A) and after (B) WGA amplification by Real-Time PCR

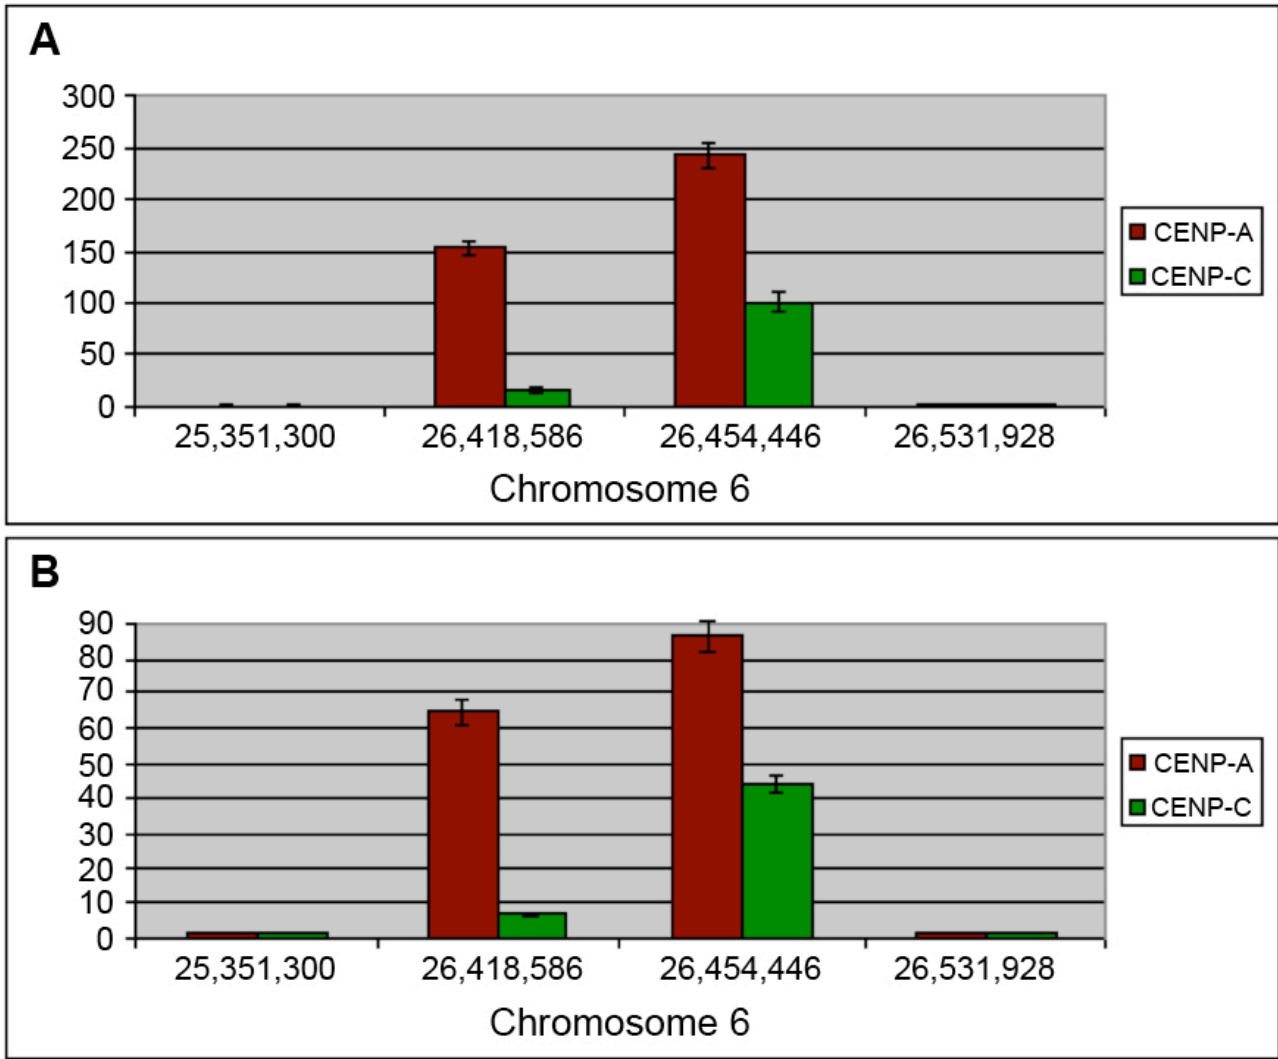

Fold enrichment of a given DNA region, immunoprecipitated with anti-CENP-A or anti-CENP-C antibodies, was calculated as the ratio between the immunoprecipitated and the input DNA. The enrichment was evaluated in two regions inside the CENP-A and CENP-C domain (chr6:26,418,586-26,418,685 and chr6:26,454,446-26,454,548) and in two regions outside the domain (chr6:25,351,300-25,351,392 and chr6:26,531,928-26,532,043). Results are the average of three independent ChIP experiments. Only the oligo starting-point is reported in the Figure.
